1  
2 **Testing the adaptive value of sporulation in budding yeast**  
3 **using experimental evolution**

4 Kelly M. Thomasson <sup>1\*</sup>, Alexander Franks <sup>2</sup>, Henrique Teotónio <sup>3</sup>, Stephen R. Proulx <sup>1</sup>

5 **1** Department of Ecology, Evolution, and Marine Biology, UC Santa Barbara, Santa  
6 Barbara, CA 93106, USA. **2** Department of Probability and Statistics, UC Santa  
7 Barbara, Santa Barbara, CA 93106, USA.

8 **3** Institut de Biologie de l'ENS (IBENS), École Normale Supérieure, CNRS, INSERM,  
9 PSL University, 75005 Paris, France.

10 \* thomasson@ucsb.edu

11 Statement of authorship: KMT and SRP conceived the experiments. KMT performed  
12 the experiments. KMT, HT, AF, and SRP performed the analysis. KMT, HT, and  
13 SRP wrote the paper.

14 Short running title: Yeast evolve to anticipate insect gut-vectoring

15 Keywords: Bayesian analysis, Experimental Evolution, *Saccharomyces*,  
16 Eco-evolutionary dynamics, heritability, dispersal, vegetative growth

17 Corresponding author: Kelly M. Thomasson, Department of Ecology, Evolution, and  
18 Marine Biology, UC Santa Barbara, Santa Barbara, CA 93106, USA. Telephone:  
19 530-906-7849.

## 20 Abstract

21 *Saccharomyces* yeast can grow through mitotic vegetative cell division while they convert  
22 resources in their environment into biomass. When cells encounter specific low nutrient  
23 environments, sporulation may be initiated and meiotic division produces 4 haploid  
24 cells contained inside a protective ascus. The protected spore state does not acquire  
25 new resources but is partially protected from desiccation, heat, and caustic chemicals.  
26 Because cells cannot both be protected and acquire resources simultaneously, committing  
27 to sporulation represents a trade-off between current and future reproduction. Recent  
28 work has suggested that one of the major environmental factors that select for the  
29 formation of spores is passaging through insect guts, as this also represents a major way  
30 that yeasts are vectored to new food sources. We subjected replicate populations of a  
31 panel of 5 yeast strains to repeated, predictable passaging through insects by feeding  
32 them to fruit flies (*Drosophila melanogaster*) and then allowing surviving yeast cell growth  
33 in defined media for a fixed period of time. We also evolved control populations using  
34 the same predictable growth environments but without being exposed to flies. We  
35 assayed populations for their sporulation rate, as measured by the percentage of cells  
36 that had sporulated after resource depletion. We found that the strains varied in their  
37 ancestral sporulation rate such that domesticated strains had lower sporulation. During  
38 evolution, all strains evolved increased sporulation in response to passaging through  
39 flies, but domesticated strains evolved to lower final levels of sporulation. We also found  
40 that exposure to flies led to an evolved change in the timing of the sporulation response  
41 relative to controls, with a more rapid shift to sporulation, and that wild-derived strains  
42 showed a more extreme response. We conclude that strains that have lost the ability to  
43 access genetic variation for total sporulation rate and the ability to respond to cues in  
44 the environment that favor sporulation due to genetic canalization during domestication.

## 45 Introduction

46 Most organisms have specialized life-history stages for growth when environmental  
47 conditions are favorable or life-history stages for dispersal to novel habitats when  
48 environmental conditions become challenging. Evolutionary theory predicts that natural  
49 selection will favor genotypes that maximize the relative fitness of expressing these  
50 life-history transitions as a function of the predictability of environmental change  
51 and the spatial structure of the populations in question (Olivieri *et al.*, 1995; Tufto,  
52 2000). Alternatively, fitness trade-offs between life-history stages can be due to genetic  
53 constraints between the relevant growth and dispersal traits, either because of negative  
54 genetic correlations if evolution occurs from standing genetic variation or lack of *de novo*  
55 mutational options (Lande, 1980).

56 In nature, populations of the budding yeast *Saccharomyces cerevisiae* are thought to  
57 primarily grow as a vegetative mitotic diploid cells and to disperse to novel habitats  
58 through the guts of insect vectors as meiotic haploid quiescent spores encapsulated within  
59 a protective structure called the ascus (Stefanini *et al.*, 2012; Gibbs and Stanton, 2001;  
60 Coluccio *et al.*, 2008). Sporulation in turn is initiated when diploid cells encounter adverse  
61 environments (Neiman, 2005). Several strains of *S. cerevisiae* have been domesticated  
62 and in these sporulation can be induced by changes in nutrient availability and pH,  
63 thought to be correlated with changes in resource availability that indicate starvation

64 (Neiman, 2005). Domesticated strains appear however to have lost much of their  
65 ancestral sporulation efficiency (as measured by sporulation rates), when compared to  
66 wild strains (Gerke *et al.*, 2006; De Chiara *et al.*, 2020), presumably because they have  
67 been cultured as growing vegetative cells for many generations and maintaining the  
68 potential to sporulate is developmentally and physiologically costly when dispersal is no  
69 longer assured by insects (Ratcliff *et al.*, 2013). Spores and vegetative cells can both  
70 survive insect guts, although with different success rates (Coluccio *et al.*, 2008), and only  
71 spores are able to cross-fertilize spores from other asci which can increase genetic  
72 variation available for future adaptation to local environmental conditions (Reuter *et al.*,  
73 2007).

74 Explanations about the evolution of sporulation have focused on a scenario where  
75 populations periodically experience ingestion by insects that cause high mortality in  
76 vegetative cells while allowing survival of spores (Ratcliff *et al.*, 2013; Coluccio *et al.*,  
77 2008). In this scenario, the fitness of a genotype depends on how many progeny cells  
78 survive ingestion and establish new colonies in the next habitat when the insect defecates.  
79 If ingestion by insects happens only rarely, or only after the local resources are depleted,  
80 then we expect genotypes that maximally convert resources into spores will evolve. In  
81 these circumstances, selection should favor genotypes that sporulate only after most  
82 nutrients are depleted and vegetative diploids experience starvation conditions. Ignoring  
83 group-level traits (but see Discussion), individual *S. cerevisiae* growth and fitness depends  
84 both on traits that confer local adaptation and traits that allow cells to accurately sense  
85 unfavorable environmental conditions and only then to initiate and complete sporulation.  
86 On the other hand, *S. cerevisiae* dispersal ability depends on the ability to survive insect  
87 guts (as spores or vegetative cells) as well as mate recognition and germination once a  
88 new suitable growth habitat is reached (Murphy and Zeyl, 2012).

89 We set out to test if fitness-trade offs between growth and dispersal traits in *S.*  
90 *cerevisiae* are genetically constrained. For this we performed a replicated selection  
91 experiment in five *S. cerevisiae* strains that varied in their level of domestication, and  
92 where cultures were given time to exhaust their nutrient and were then propagated  
93 either through the guts of *Drosophila melanogaster* fruit-flies or directly transferred. All  
94 strains were initially isogenic and homothalic, such that evolution during the experiment  
95 could only occur through selection on *de novo* mutations and with little opportunity for  
96 recombination during the experiment. If fitness trade-offs result from a genetic constraint,  
97 then domesticated strains may have lost most of their ability to respond to selection for  
98 increased or faster sporulation, when compared with the wild strains. An alternative  
99 mode of adaptation to insect passaging would be to evolve increased vegetative cell  
100 survival through the *D. melanogaster* gut. The selection response of populations that  
101 were directly transferred allow us to disentangle genetic constraints between sensing  
102 starvation and initiation of sporulation independently of *D. melanogaster* gut vectoring.

## 103 **Methods**

### 104 **Yeast and fruit-fly strains**

105 We used a set of five genetically distinct strains of *S. cerevisiae* that were provided as  
106 homozygous diploids with resistance to Geneticin (G418), an orthologue to kanamycin,  
107 (Louvel *et al.*, 2014) obtained from the National Collection of Yeast Cultures, UK.

108 These five strains represent a wide range of ecological backgrounds including an Oak  
109 woodland in the Northeast United States (North American strain, AM), a palm flower in  
110 a Malaysian forest (Malaysian, MY), a West African strain from a semi-natural beer  
111 fermentation (West African, WA), a Sake brewery in Japan (Japanese Sake, JS), and  
112 a winery in Western Europe (Wine European, WE). These strains cover a range of  
113 backgrounds from wild, to partially human associated, to fully domesticated. Each  
114 strain was genetically modified for use in a lab setting by knocking out the mating  
115 type switching locus and adding DNA barcodes with stable diploid strains produced by  
116 complementary mating.

117 Each Ancestor was split into 4 replicate populations, which were then split into  
118 control and treatment populations. These 40 experimental populations were evolved  
119 for 30 full cycles of population growth, starvation, and passaging. Passaging was  
120 through *Drosophila* feeding in the treatment populations and by pipette for the control  
121 populations.

122 The *D. melanogaster* stocks used in one of the selection treatments (see next section)  
123 were created by outcrossing strains from isogenic Al-Ral, Taiwanese, Santa Barbarian  
124 and Malaysian lines. Flies to be used as vectors during the experiments were allowed to  
125 lay eggs on YPD agar plates. Adult flies were then removed and the eggs were bleached  
126 using a 10% bleach solution for 40 minutes at 22 °C. Fly eggs were collected by sterile  
127 pipette, washed with sterile water, and transferred using sterile technique to clean media.  
128 Clean flies were reared and propagated on this media so that other yeasts and fungi  
129 were minimized, but also so that the ingestion of antifungal elements did not reduce the  
130 viability of living yeasts traveling through the gut.

## 131 Selection protocol

132 We grew each of our five diploid yeast strains in 2 mL of YPD (Yeast-Peptone-Dextrose)  
133 liquid culture over a 5 day period. Samples of these initial strains were then frozen in  
134 15% glycerol solution at -80 °C and labelled as the “Ancestral” treatment. The five  
135 strains were split into 4 replicate each, and each was then split again into a paired  
136 control and treatment population (Figure 1).

137 At the start of each selection cycle, each population was incubated in YPD at 30  
138 °C for 5 days without shaking. In order to reduce chances of contamination from other  
139 yeasts or bacteria, cultures were always grown in YPD media with G418, tetracycline,  
140 and ampicillin added. We performed experiments without shaking to increase the  
141 opportunities for haploid cells developing from spores to mate and form diploids. Under  
142 these growth conditions, yeast populations usually consume most of the sugar resources  
143 within 24 hours, and the 5 day period allowed ample time for spore formation to be  
144 initiated and completed.

145 After the 5 day period, each population was adjusted to an optical density of 0.3  
146 in an effort to both ensure adequate population size and to prevent blockage in the  
147 capillary tube in the CaFe vial caused by high cell density (see below). The dilution  
148 process was performed using spent YPD, YPD that had been depleted by culturing  
149 yeast for 2 weeks and then filter sterilized. Spent YPD (SYPD) was used to mimic  
150 carbon and nitrogen sources in a late growth stage yeast culture population and to  
151 minimize population growth or germination of sporulated yeast cells (Madhani, 2007;  
152 Neiman, 2005).

153 For the fruit-fly experimental treatment we employed the Fly Capillary Feeder (CaFe)  
154 apparatus, adapted from Ja *et al.* (2007). CaFe tops used four 200 $\mu$ L pipette tips which  
155 were cut to increase opening size, rubber stoppers and standard rubber bands. These  
156 CaFe tops were then affixed to narrow fly vials each containing 2ml of 3% solidified  
157 agarose solution to maintain humidity within the vial. The pipette tips within the CaFe  
158 top were fitted to one 5 $\mu$ L capillary tube each. 18 hours prior to treatment, four clean,  
159 sexed flies were added to each of four vials per replicate. This starvation period was  
160 added to ensure sufficient consumption of yeast by the flies during treatment (Reuter  
161 *et al.*, 2007).

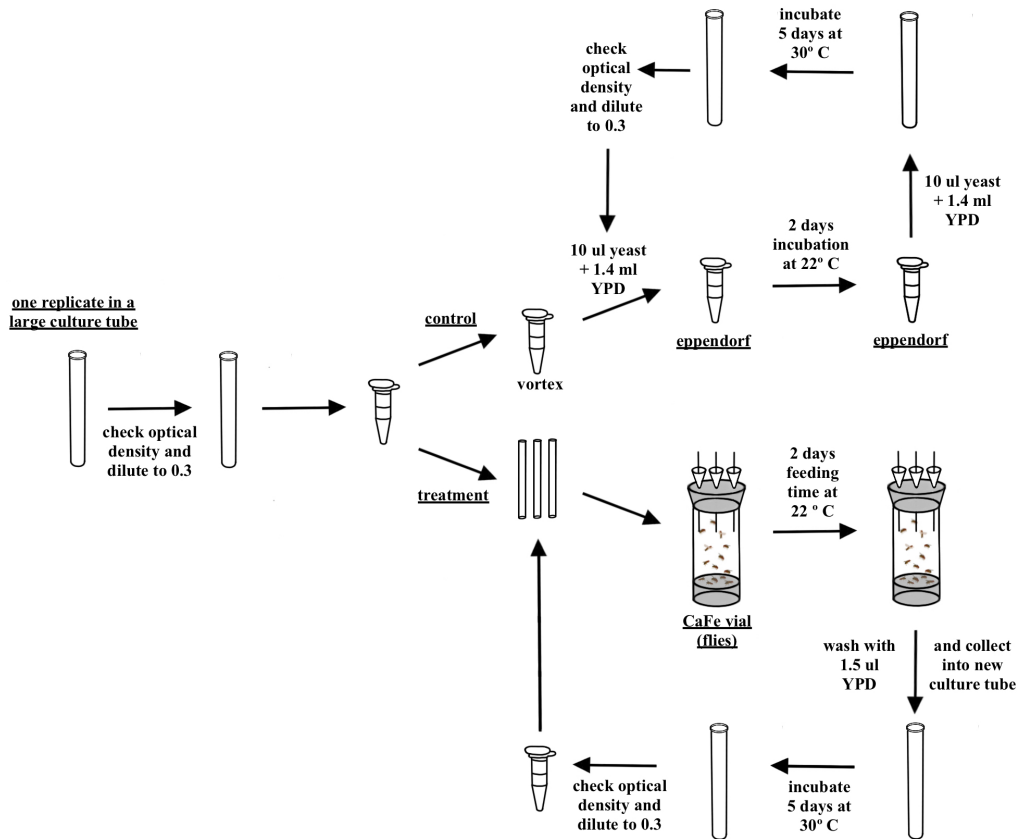

Figure 1: Each lineage was grown in liquid media and the sample was adjusted to an optical density of 0.3 and split into control and treatment tubes. From that point, the control and treatment went through parallel procedures lasting 7 days: 2 days of exposure to treatment (control: 22 $^{\circ}$ C bench-top incubation; treatment: 22 $^{\circ}$ C exposure to flies) and 5 days of growth or sporulation in liquid media at 30 $^{\circ}$ C. This was repeated for 30 cycles.

162 Yeast cultures were distributed into CaFe feeding apparatus and offered to 3-4 clean  
163 flies (see above). Flies were allowed to feed for 48 hours and then removed from the  
164 vials. Measurements of total fly food consumption were taken by recording the change in

165 meniscus of the two capillary tubes. Flies were removed from the vials which were then  
166 rinsed with 1.6 mL YPDA media and the supernatant (1.5 mL total volume because  
167 some volume is reabsorbed into the agar in the vial) was collected and used as the  
168 inoculate for the next round of yeast population growth.

169 For the control selection treatment yeast cultures were not distributed into the CaFe  
170 feeding apparatus, being instead placed on the bench-top nearby. After 48h, each control  
171 population was vortexed and 10 $\mu$ L of each culture was moved to 1.49 mL of YPDA in a  
172 new culture tube (1.5 mL total volume).

173 These selection protocols were repeated for 30 growth cycles. Samples of each  
174 population were frozen every other cycle as a backup in case of contamination. After  
175 the last cycle all population were frozen and stored at -80 °C.

## 176 Sporulation assay

177 The sporulation assay was performed in two blocks defined by the date of assay ex-  
178 periment, with each block containing samples of all 40 control and treatment replicate  
179 populations as well as the ancestral populations. Each ancestral population was assayed  
180 6 times. In each block, two samples were taken from each population and then further  
181 divided into two technical replicates each for measurement. For the ancestral populations,  
182 three samples were taken in each assay block, also divided into two technical replicates.

183 We first grew thawed population samples on YPD agar plates and then inoculated  
184 liquid YPD cultures which grew for 6 hours without shaking at 30°C. Each sample was  
185 diluted to an optical density of 1.5 and 2 mL was centrifuged and washed to remove any  
186 traces of growth media. Cells were then resuspended in in 2 mL of Potassium Acetate (  
187 2% KAc at pH  $\approx$  6.7), and incubated at 30°C with shaking (230 rpm). Measurements  
188 were taken at 2.5 days and at 5 days. Samples were diluted by taking 5 $\mu$ L of sample  
189 and 95 $\mu$  L water. A field of cells was then photographed at 400X magnification. Images  
190 were processed by adding a grid and counting the number of spores and vegetative cells.

## 191 Statistical analysis

192 We developed hierarchical models of sporulated cell counts where the observed counts  
193 were taken to be binomially distributed. We modeled the logit of the binomial parameter  
194 as a linear function of the interaction between selection treatment, and assay time  
195 along with a random effect of the replicate population, where we pooled variation  
196 among sampling and technical replicates. We performed these analyses separately on  
197 the Ancestral populations because they necessarily do not have the same structure of  
198 replicate experimental populations. For the experimentally evolved populations, we  
199 modelled each strain separately and then performed comparative analyses on the inferred  
200 posterior distributions.

201 The main model considers the sporulation probability to be a function of the  
202 treatment type (fly treatment or control) and the assay time (2.5 days or 5 days) giving

$$\begin{aligned}\theta_i &= \beta_{T_i, A_i} + \phi_{\text{replicate}_i} \\ C_i &\sim \text{Binomial}(N_i, \text{logit}^{-1}(\theta_i))\end{aligned}\quad (1)$$

203 where  $C_i$  is the count of sporulated cells in sample  $i$ ,  $N_i$  is the total number of cells  
204 counted in sample  $i$ . The predictor  $\beta$  depends on the  $T$  treatment type and the  $A$  assay

205 time of observation  $i$ .

206 We additionally modeled the variation that comes from replicate populations sharing  
207 the same ancestry as

$$\begin{aligned}\phi_i &\sim \text{Normal}(0, \sigma^2) \\ \sigma &\sim t_3(0, 10)\end{aligned}$$

208 meaning that each replicate population is considered to be sampled from a normal  
209 distribution and the prior on the standard deviation is a Student's t distribution with 3  
210 degrees of freedom, a location of 0 and scale of 10.

211 Here, because we assume that the parameter for each combination of strain, treatment,  
212 and assay time is independent, this is similar to a generalized linear model with main  
213 effects and interaction terms for each of the three factors. The additional term  $\phi$   
214 represents the random effect of the four replicate populations and effectively allows for  
215 overdispersion of the count data relative to a binomial model. Such overdispersion in  
216 the count data could arise due to idiosyncratic differences during the creation of the  
217 replicate experimental populations from the ancestral strain.

218 We took a Bayesian approach for parameter inference and compared posterior  
219 distributions of parameter estimates as a way to evaluate hypotheses regarding the  
220 causes of selection responses. We specified the models using `BRMS` (Bürkner, 2017,  
221 2018) and `STAN` (Stan Development Team, 2018) using `RStan` which performs Bayesian  
222 inference using a Hamiltonian Monte Carlo sampling to calculate the posterior probability  
223 of the model parameters given the observed data (`R` version 3.3.2, `RStan` version 2.15.1)  
224 (`R` Core Team, 2019). Convergence of the MCMC chains was checked by ensuring that  $\hat{R}$   
225 was less than 1.1, where  $\hat{R}$  is a metric describing the variability between chains (Gelman  
226 *et al.*, 2013).

## 227 Data and code archiving

228 All data and code for analysis will be submitted to Data Dryad. Complete code to  
229 perform the analysis is available in a supplemental RMarkdown file.

## 230 Results

### 231 Ancestral sporulation rates

232 Sporulation rates at both assay times differ among the ancestral strains (Figure 2). We  
233 also compared the model with factorial effects of strain and assay time to a model with  
234 no effect of strain and found that the full model was highly supported (see supplementary  
235 rMarkdown file). As expected, this reflects their evolutionary history, with strains coming  
236 from natural environments showing higher sporulation rates while strains from industrial  
237 alcohol production showing lower sporulation rates (Gerke *et al.*, 2006; De Chiara *et al.*,  
238 2020). The African strain WA, which is thought to be only partially-domesticated (see  
239 Methods) shows intermediate sporulation rates.

240 The sporulation rates of the strains are distinct as is the transition between days 2.5  
241 and day 5, inferred by comparing models that do not include the strain or day of assay  
242 effect (see supplementary R markdown file). The strain effect can also be visualized by

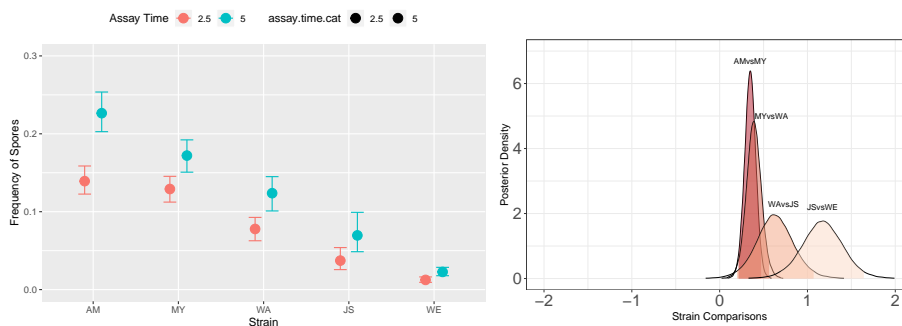

Figure 2: Sporulation rates in the ancestral strains. Panel A shows the fitted values for sporulation rate measured at 2.5 and 5 days (see equation 1), with the solid circles showing the median posterior value and the bars are the 95% posterior credible interval. The strains are arranged by decreasing ancestral sporulation rate, which also reflects the the degree of domestication (AM and MY, wild; WA, partially-domesticated; JS and WE, industrial). The difference between sporulation rate at 2.5 and 5 days can be interpreted as the speed at which vegetative cells enter and complete sporulation. Wild strains therefore show a faster transition to sporulation than domesticated strains. Panel B shows the pairwise comparisons between successive strains at the 5 day assay time point. The posterior probability of the difference being less than 0 is less than 0.001 for all comparisons

243 comparing the posterior distributions of the day five assay in a pairwise fashion between  
244 each successive strain to show that each strain has a distinct sporulation rate (figure 2)

245 The difference between sporulation rate at 2.5 and 5 days represents the speed  
246 at which vegetative cells enter and complete sporulation once they sense starvation  
247 conditions while in the culture tubes (Figure 1). For this trait, wild strains show  
248 a sharper change in completed sporulation between the time points as compared to  
249 domesticated strains (Figure 2). Note also that the strains are inferred to have distinct  
250 sporulation rates, as the posterior distributions between strains do not overlap at the  
251 95% level.

## 252 Selection responses in the fruit-fly treatment

253 After 30 growth cycles involving fruit-fly gut dispersal the evolved populations showed  
254 higher sporulation rates (Figure 3 and figure 4). For all strains, the posterior distribution  
255 is well away from 0 (the posterior probability of the difference from the ancestral being  
256 less than zero is less than  $10^{-3}$ ), with sporulation rates of the evolved populations at  
257 the assay time of day 5 ranging from 30% to 95%. However, the magnitude of this effect  
258 is independent of the degree of domestication: for example, one of the wild strains (AM)  
259 shows the maximum response relative to its ancestral state, while another wild strain  
260 (MY) shows an intermediate response.

261 The rate of sporulation completion, as measured by the assay time effect, varies  
262 with the degree of domestication (Figure 5). Wild strains showed a large response to  
263 fly vectoring in that there was a quicker evolved onset of sporulation (the posterior  
264 probability of the difference from the ancestral being less than zero is less than  $10^{-3}$ ).  
265 The other three strains showed more modest responses to selection and the posterior



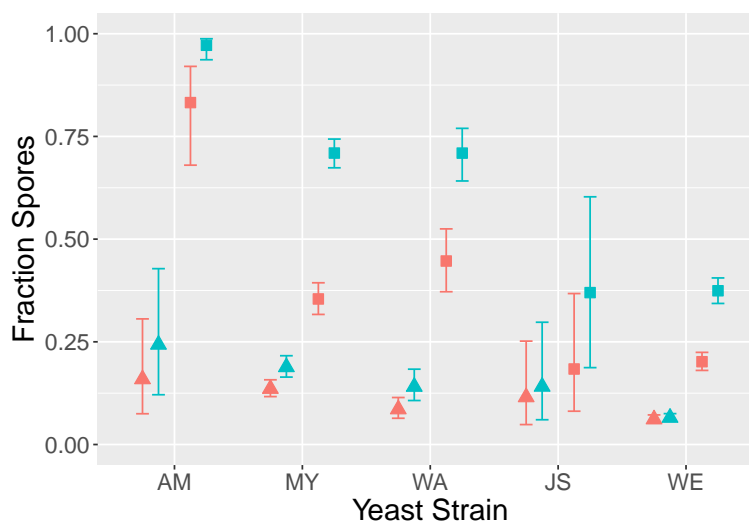

Figure 3: Inferred sporulation frequencies in the experimentally evolved strains. The triangles represent control population, while squares represent fly treatment populations. The red fill is for the 2.5 day assay point, while the blue fill is for the 5 day assay point. Replicate populations in each treatment are modeled hierarchically.

266 probability of a difference from the ancestor overlapped with 0.

### 267 Selection responses in the control treatment

268 There is evidence that some of the control evolution treatment strains show a directional  
269 shift in sporulation rate (Figure 4). For the two domesticated strains (WE and JS)  
270 the posterior distributions for sporulation rates and assay time changed significantly  
271 after evolution. Both WE and JS increased their total sporulation rate in response to  
272 control evolution conditions (posterior probability of a change less than 0 of less than  
273  $10^{-3}$  for WE and of less than 0.05 for JS). In contrast, each of the other strains broadly  
274 overlapped with 0 change from the ancestor. In terms of the timing of sporulation,  
275 only WE was strongly diverged from the ancestor, with a decrease in the effect of assay  
276 time on sporulation (the posterior probability of the difference from the ancestral being  
277 greater than zero is less than  $10^{-3}$ ).

### 278 Comparison between the selection response in the fruit-fly and control 279 conditions

280 Comparisons between the fly evolved treatment populations and the control evolved  
281 treatment populations show a consistent effect of exposure to fly vectoring that involved  
282 and increase in the total sporulation rate and an increase in the assay timing effect (see  
283 figures 4 and 5). In all cases the posterior probability of the difference between the  
284 treatment and control being less than zero is less than  $10^{-3}$ .

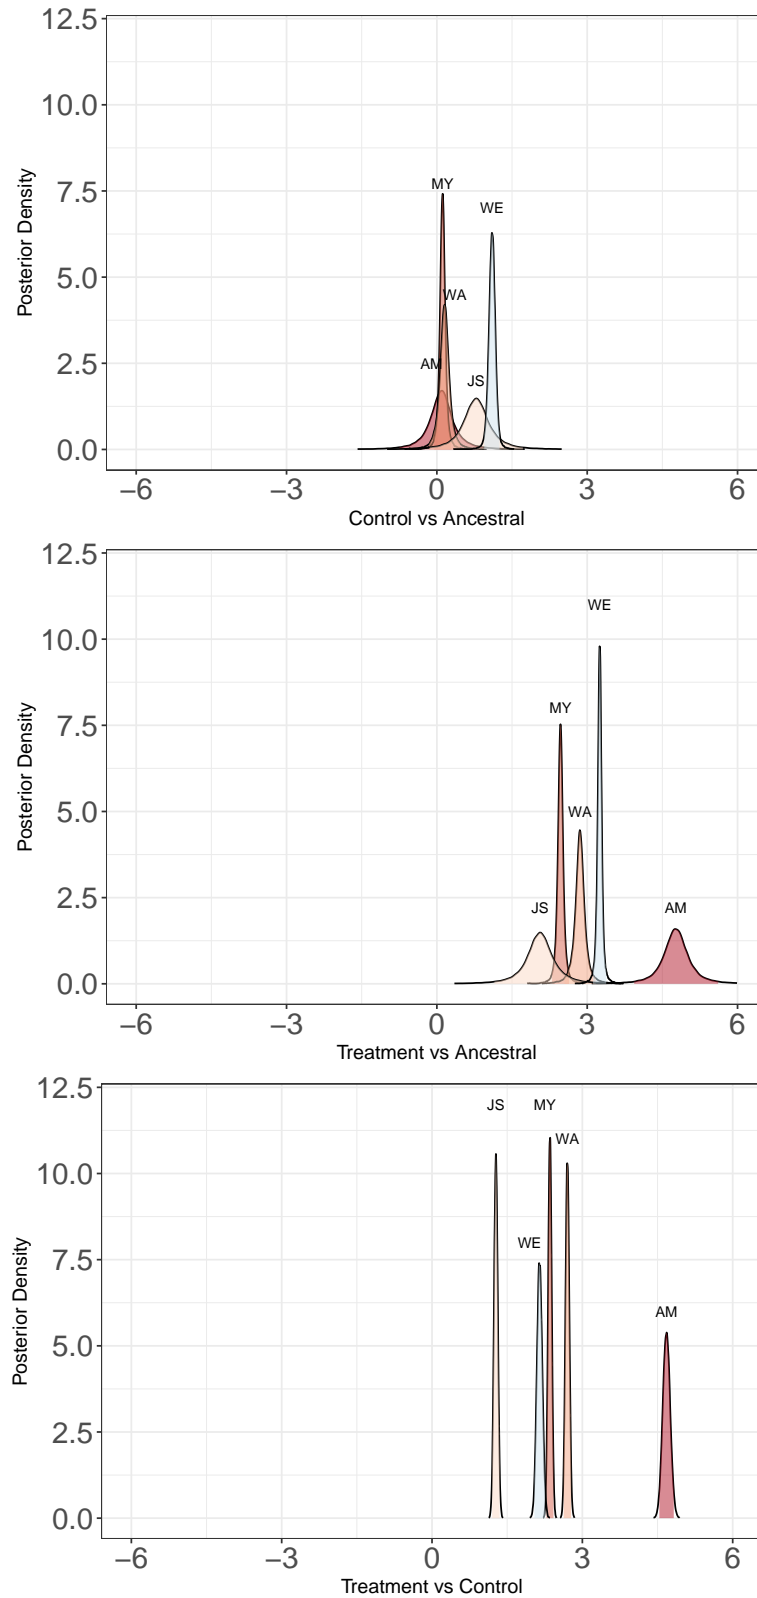

Figure 4: Three representations of the effect of treatment on sporulation rate. The top two panels compare the posterior distributions from the strain-specific models to the mean of the ancestral inference for that strain. The bottom panel compares the treatment to control for each strain.

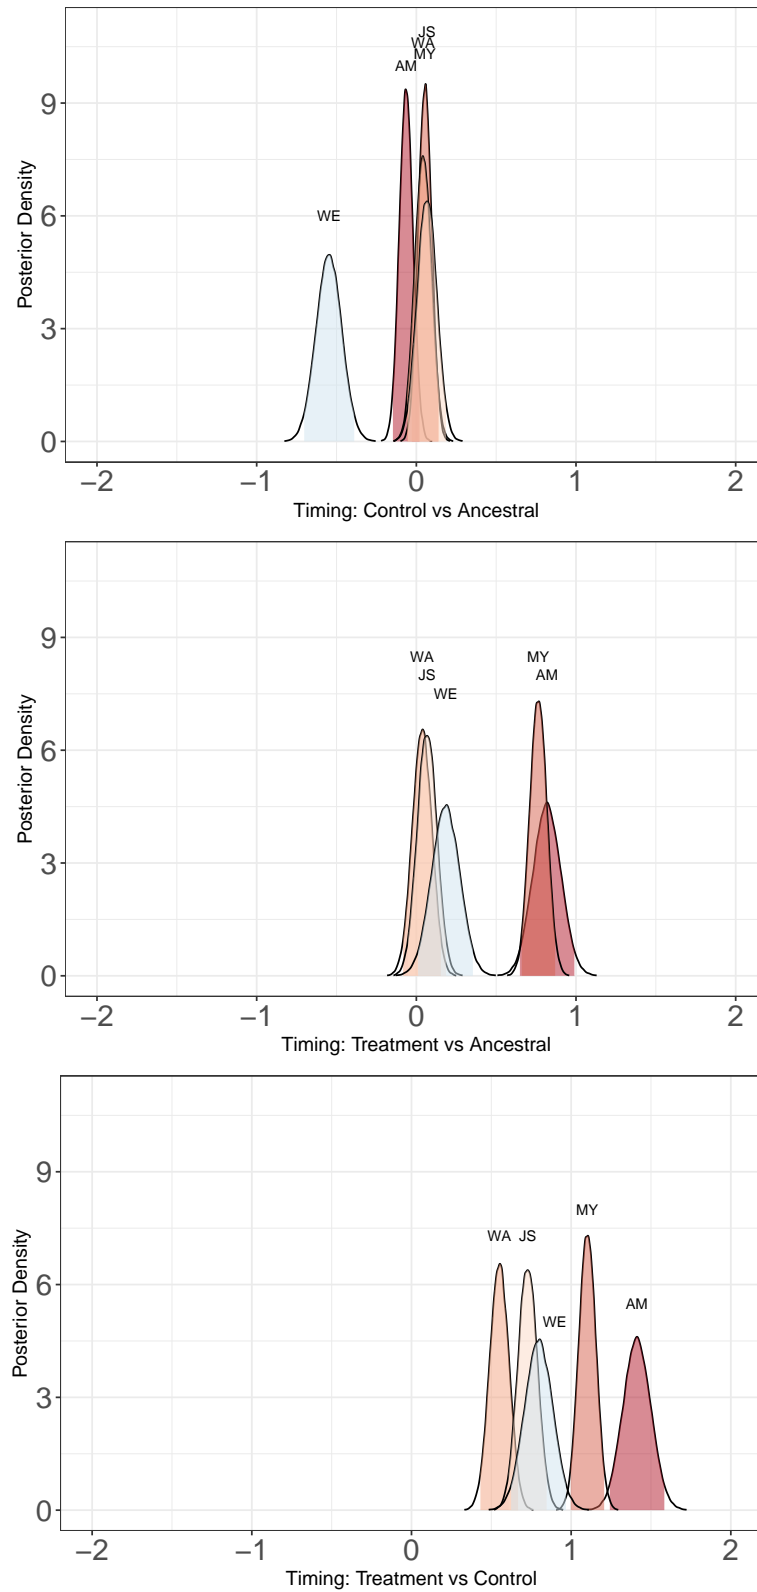

Figure 5: The effect of the fly treatment on the timing of sporulation. Larger positive values indicate sharper transition to sporulation between the time point at day 2.5 and at day 5. Comparisons between the treatment and control evolution experiments show that the transition to sporulation is sharper for populations evolving in the presence of flies.

## 285 Discussion

286 Previous studies have suggested that sporulation in budding yeast is an adaptation  
287 allowing lineages to survive passaging through insect vectors, e.g. (Coluccio *et al.*, 2008;  
288 Neiman, 2005). These arguments are based on observations of differential survival by  
289 vegetative cells and spores in *Drosophila* frass. Other work has suggested that selection  
290 for dispersal traits, such as mating ability and germination, may also favor sporulation  
291 because insect digestion breaks up the ascus freeing non-related spores to mate following  
292 deposition of frass on fresh food sources (Reuter *et al.*, 2007). Selection on sporulation  
293 onset and completion may however also depend on the timing of resource competition  
294 between unrelated vegetative cells, and the mortality effects of challenging environments  
295 (Ratcliff *et al.*, 2013).

296 Our results mostly support the latest view about the adaptive value of sporulation.  
297 We found that strict passaging through the *Drosophila* digestive tract resulted in the  
298 evolution of both faster sporulation and higher sporulation rates. Since both of these  
299 traits are properties of the growing vegetative cells, we might have expected that  
300 domesticated strains would show partial loss of sensitivity to starvation as well as  
301 reduced initiation and completion of sporulation. Given that these strains are starting  
302 from a deficit in their tendency to sporulate, these lineages could have adapted to  
303 passaging through *Drosophila* guts by increasing vegetative cell survival through the  
304 gut. Indeed, analysis of a large set of yeast isolates has shown that some strains have  
305 evolved increased survival of quiescent vegetative cells (De Chiara *et al.*, 2020). This  
306 was not the case here, where even the domesticated strains showed a strong response to  
307 the fly treatment in terms of their total sporulation rate. However, domesticated strains  
308 evolved a lower overall sporulation rate and lower speed of sporulation, as compared  
309 with the wild strains. This suggests that domestication led to the loss of mutational  
310 options that allow the cells to sense and respond to environmental changes. These  
311 results are reminiscent of those of Kvitek and Sherlock (Kvitek and Sherlock, 2013),  
312 where experimental evolution in constant environment led to the loss of developmental  
313 and physiological programs involved in the sensing of environmental variation.

314 Because our experiments allowed populations to grow for a fixed time period before  
315 ingestion, we expected selection for a steep change in sporulation rates associated  
316 with that timing or alternatively for vegetative cell starvation sensing. In particular,  
317 there was ample time before ingestion to deplete nutritional resources, sense it and  
318 respond appropriately. The results observed in the control populations, which were  
319 not passaged through the *Drosophila* gut but that were also subjected to selection for  
320 starvation resistance are instructive. In them, we found that only those derived from  
321 the domesticated isolates showed an increase in total sporulation rate. We might have  
322 expected all populations to evolve decreased sporulation if vegetative cell resistance  
323 instead evolved. Mutational options towards vegetative cell resistance thus appear  
324 to be fewer than those of sporulation. Selection responses in both of our treatments  
325 further indicate that the adaptive value at the origin of sporulation was not to survive  
326 insect vectoring, or outcrossing, but the ability to cope with challenging environments.  
327 Sporulation was perhaps just co-opted as a dispersal strategy because of ecological  
328 constraints, namely that small Drosophilids may preferentially diet on yeast (Schiabor  
329 *et al.*, 2014) and are small enough to vector them between favorable habitats (Gibbs  
330 and Stanton, 2001; Stamps *et al.*, 2012; Tsai *et al.*, 2008).

331 We focused on selection for sporulation based on individual selection. Natural yeast  
332 populations are strongly spatially-structured and thus group-level selection must have also  
333 be at work in nature. Theoretical expectations for the evolution of sporulation in these  
334 circumstances depends on the way that cells gain resources from the environment and  
335 are passaged to future demes. In our experiments, there was strict vertical transmission  
336 of populations through insect ingestion and selection was strongest on surviving the  
337 passaging event itself. In spatially-heterogeneous conditions, sporulation by an individual  
338 cell should evolve in response to the pattern of variability in terms of both resource  
339 availability and timing of insect ingestion. Prior theory on this idea treats the evolution of  
340 the sporulation as a kin selection problem, asking how an individual cell that sporulates  
341 affects clone-mates in terms of resource availability (Ratcliff *et al.*, 2013), because cells  
342 that sporulate will stop taking up resources, which are then available both to genetically-  
343 related and genetically-unrelated cells in the same environment. The degree of mixing  
344 between cell lineages in the founding of new demes probably limits kin selected benefits  
345 and will likely select for increases in the total number of viable emigrants each genotype  
346 produces from an existing demes; but such theory remains to be fully developed.

347 In the context of a competition-colonization trade-off (Tilman, 1994), a yeast strain  
348 that sporulates earlier or at a higher frequency before ingestion by insects is more likely  
349 to survive the process of ingestion, digestion and transfer. However, if the period of  
350 competition within a deme is long, the higher sporulating genotype will reproduce more  
351 slowly and eventually be displaced by genotypes that have lower sporulation rates. In  
352 contrast, once insect ingestion occurs, genotypes that have a higher fraction of cells  
353 in the sporulated state will have higher survivorship during vectoring and therefore  
354 increased representation in newly founded demes. Competition-colonization trade-offs  
355 can thus allow coexistence of alternative strategies, sometimes allowing many strategies  
356 to coexist (Snyder and Adler, 2011). We speculate that such competition-colonization  
357 trade-offs lead to coexistence of yeast species with similar physiological niches but  
358 differing sporulation and germination programs. In particular, *S. cerevisiae* and *S.*  
359 *paradoxus* have similar developmental and physiological profiles for surviving adverse  
360 environments but, tellingly, differing sporulation and germination programs (Murphy  
361 and Zeyl, 2010, 2012). A possible explanation for this coexistence therefore is that they  
362 occupy distinct positions in the competition-colonization space. And in general, such  
363 competition-colonization trade-offs may explain much of the biological diversity found  
364 in microbes.

## 365 Acknowledgements

366 We would like to acknowledge Fernanda Pett for her fantastic diagrams of the exper-  
367 imental design. We thank Uma Rajpurkar and Tracy Yu. HT is supported Agence  
368 Nationale pour la Recherche (ANR-17-CE02-0017-01, ANR-18-CE02-0017-01), SRP  
369 by the National Science Foundation (EF-1137835) and the pepiniere interdisciplinaire  
370 CNRS-PSL Eco-Evo-Devo.

## 371 References

- 372 Bürkner, P.-C. 2017. brms: An R package for Bayesian multilevel models using Stan.  
373 *Journal of Statistical Software*, 80(1): 1–28.
- 374 Bürkner, P.-C. 2018. Advanced Bayesian multilevel modeling with the R package brms.  
375 *The R Journal*, 10(1): 395–411.
- 376 Coluccio, A., R.K., R., M.J., K., and A.M., N. 2008. The yeast spore wall enables spores  
377 to survive passage through the digestive tract of drosophila. *PLoS ONE*, 3(8): e2873.
- 378 De Chiara, M., Barré, B., Persson, K., Chioma, A. O., Irizar, A., Schacherer, J.,  
379 Warringer, J., and Liti, G. 2020. Domestication reprogrammed the budding yeast life  
380 cycle. *bioRxiv*.
- 381 Gelman, A., Carlin, J. B., Stern, H. S., Dunson, D. B., Vehtari, A., and Rubin, D. B.  
382 2013. *Bayesian Data Analysis*. Oxford Series in Ecology and Evolution. CRC Press,  
383 Boca Raton, Florida, third edition.
- 384 Gerke, J. P., Chen, C. T. L., and Cohen, B. A. 2006. Natural isolates of *saccharomyces*  
385 *cerevisiae* display complex genetic variation in sporulation efficiency. *Genetics*, 174(2):  
386 985–997.
- 387 Gibbs, J. P. and Stanton, E. J. 2001. Habitat fragmentation and arthropod community  
388 change: carrion beetles, phoretic mites, and flies. *Ecological Applications*, 11(1):  
389 79–85.
- 390 Ja, W. W., Carvalho, G. B., Mak, E. M., de la Rosa, N. N., Fang, A. Y., Liang, J. C.,  
391 Brummel, T., and Benzer, S. 2007. Prandiology of drosophila and the CAFE assay.  
392 *Proceedings of the National Academy of Sciences of the United States of America*,  
393 104(20): 8253–8256.
- 394 Kvitek, D. and Sherlock, G. 2013. Whole genome, whole population sequencing reveals  
395 that loss of signaling networks is the major adaptive strategy in a constant environment.  
396 *PLoS Genetics*, 9(1): e1003972.
- 397 Lande, R. 1980. The genetic covariance between characters maintained by pleiotropic  
398 mutations. *Genetics*, 94(1): 203–15. Lande, R eng 1980/01/01 00:00 Genetics. 1980  
399 Jan;94(1):203-15.
- 400 Louvel, H., Gillet-Markowska, A., Liti, G., and Fischer, G. 2014. A set of geneti-  
401 cally diverged *saccharomyces cerevisiae* strains with markerless deletions of multiple  
402 auxotrophic genes. *Yeast*, 31(3): 91–101.
- 403 Madhani, H. D. 2007. *From a to [alpha]: Yeast as a Model for Cellular Differentiation*.  
404 CSHL Press.
- 405 Murphy, H. A. and Zeyl, C. W. 2010. Yeast sex: surprisingly high rates of outcrossing  
406 between asci. *Plos One*, 5(5): e10461.

- 407 Murphy, H. A. and Zeyl, C. W. 2012. Prezygotic isolation between *saccharomyces*  
408 *cerevisiae* and *saccharomyces paradoxus* through differences in mating speed and  
409 germination timing. *Evolution*, 66(4): 1196–1209.
- 410 Neiman, A. M. 2005. Ascospore formation in the yeast *saccharomyces cerevisiae*.  
411 *Microbiology and Molecular Biology Reviews*, 69(4): 565–584.
- 412 Olivieri, I., Michalakis, Y., and Gouyon, P.-H. 1995. Metapopulation genetics and the  
413 evolution of dispersal. *The American Naturalist*, 146(2): 202–228.
- 414 R Core Team 2019. *R: A Language and Environment for Statistical Computing*. R  
415 Foundation for Statistical Computing, Vienna, Austria.
- 416 Ratcliff, W. C., Hoverman, M., Travisano, M., and Denison, R. F. 2013. Disentangling  
417 direct and indirect fitness effects of microbial dormancy. *The American Naturalist*,  
418 182(2): 147–156.
- 419 Reuter, M., Bell, G., and Greig, D. 2007. Increased outbreeding in yeast in response to  
420 dispersal by an insect vector. *Current Biology*, 17(3): R81–R83.
- 421 Schiabor, K. M., Quan, A. S., and Eisen, M. 2014. Non-respiratory functions of  
422 *saccharomyces cerevisiae* mitochondria are required for optimal attractiveness to  
423 *drosophila melanogaster*. *BioRxiv*, page 007336.
- 424 Snyder, R. E. and Adler, P. B. 2011. Coexistence and coevolution in fluctuating  
425 environments: can the storage effect evolve? *The American Naturalist*, 178(4):  
426 E76–E84.
- 427 Stamps, J. A., Yang, L. H., Morales, V. M., and Boundy-Mills, K. L. 2012. *Drosophila*  
428 regulate yeast density and increase yeast community similarity in a natural substrate.  
429 *Plos One*, 7(7): e42238.
- 430 Stan Development Team 2018. RStan: the R interface to Stan. R package version 2.18.1.
- 431 Stefanini, I., Dapporto, L., Legras, J.-L., Calabretta, A., Di Paola, M., De Filippo, C.,  
432 Viola, R., Capretti, P., Polsinelli, M., Turillazzi, S., and Cavalieri, D. 2012. Role of  
433 social wasps in *saccharomyces cerevisiae* ecology and evolution. *Proceedings of the*  
434 *National Academy of Sciences of the United States of America*, 109(33): 13398–13403.
- 435 Tilman, D. 1994. Competition and biodiversity in spatially structured habitats. *Ecology*,  
436 75(1): 2–16.
- 437 Tsai, I. J., Bensasson, D., Burt, A., and Koufopanou, V. 2008. Population genomics of  
438 the wild yeast *saccharomyces paradoxus*: Quantifying the life cycle. *Proceedings of the*  
439 *National Academy of Sciences of the United States of America*, 105(12): 4957–4962.
- 440 Tufto, J. 2000. The evolution of plasticity and nonplastic spatial and temporal adap-  
441 tations in the presence of imperfect environmental cues. *The American Naturalist*,  
442 156(2): 121–130. PMID: 10856196.
